# Supplementary material for: Six degree-of-freedom knee joint kinematics in obese individuals with knee pain during gait
Source: PLoS One. 2017 Mar 24;12(3):e0174663. doi: 10.1371/journal.pone.0174663 (PMC5365132; doi:10.1371/journal.pone.0174663)
Supplement: S1 File — Six degree-of-freedom kinematics during stance phase of treadmill gait in obese individuals with knee pain. (CSV) [file pone.0174663.s001.csv]

	Rotation	Rotation	Rotation	Rotation	Rotation	Rotation	Rotation	Rotation	Rotation	Rotation	Rotation	Rotation	Rotation	Rotation	Rotation	Rotation	Rotation	Rotation	Rotation	Rotation	Rotation	Rotation	Rotation	Rotation	Rotation	Rotation	Rotation	Rotation	Rotation	Rotation	Translation	Translation	Translation	Translation	Translation	Translation	Translation	Translation	Translation	Translation	Translation	Translation	Translation	Translation	Translation	Translation	Translation	Translation	Translation
Time	FLE_S1	FLE_S2	FLE_S3	FLE_S4	FLE_S5	FLE_S6	FLE_S7	FLE_S8	FLE_S9	FLE_S10	ADD_S1	ADD_S2	ADD_S3	ADD_S4	ADD_S5	ADD_S6	ADD_S7	ADD_S8	ADD_S9	ADD_S10	ITR_S1	ITR_S2	ITR_S3	ITR_S4	ITR_S5	ITR_S6	ITR_S7	ITR_S8	ITR_S9	ITR_S10	MTT_S1	MTT_S2	MTT_S3	MTT_S4	MTT_S5	MTT_S6	MTT_S7	MTT_S8	MTT_S9	MTT_S10	ATT_S1	ATT_S2	ATT_S3	ATT_S4	ATT_S5	ATT_S6	ATT_S7	ATT_S8	ATT_S9
0	3.00416	17.87731	22.3132	-4.29872	14.12667	25.40538	7.97281	-9.06617	21.78808	14.61188	-7.71234	-5.80589	-2.34141	-0.28996	-1.21563	-6.53908	-3.15225	-0.7891	-2.70845	-4.34736	-11.73046	-9.00075	6.99807	-2.89398	6.70238	21.40384	-2.35118	-0.6764	8.10106	4.69753	-6.05003	-2.12159	-4.02189	-0.67628	-3.72466	-2.56876	-6.51477	-5.72576	-1.28172	-3.86733	-0.61971	-2.96109	7.44176	1.80423	-0.03034	4.79781	2.75291	-1.95755	7.39726
1	3.34904	17.52537	22.36654	-4.03931	14.7771	24.8501	8.00917	-8.43175	21.5714	14.80048	-7.68654	-5.89573	-2.36117	-0.50605	-1.16235	-6.48193	-3.12752	-0.8436	-2.68548	-4.31484	-11.7804	-8.97954	7.01729	-2.63785	6.91294	21.13989	-2.42551	-0.48591	8.01665	4.68304	-6.12043	-2.04203	-3.97077	-0.59263	-3.9525	-2.57171	-6.51703	-5.55319	-1.28305	-3.89804	-0.72368	-2.74811	7.5039	1.90747	-0.06737	4.83026	2.89119	-1.68236	7.32715
2	3.69392	17.17343	22.41988	-3.7799	15.42753	24.29481	8.04553	-7.79733	21.35473	14.98908	-7.66073	-5.98556	-2.38093	-0.72213	-1.10907	-6.42477	-3.1028	-0.89809	-2.6625	-4.28232	-11.83034	-8.95832	7.0365	-2.38171	7.12351	20.87593	-2.49984	-0.29542	7.93224	4.66856	-6.19083	-1.96247	-3.91964	-0.50898	-4.18034	-2.57465	-6.51928	-5.38061	-1.28437	-3.92875	-0.82765	-2.53513	7.56605	2.01071	-0.1044	4.8627	3.02948	-1.40718	7.25704
3	4.38368	16.46956	22.52656	-3.26108	16.7284	23.18425	8.11825	-6.52849	20.92137	15.36628	-7.60912	-6.16523	-2.42045	-1.1543	-1.00251	-6.31046	-3.05336	-1.00707	-2.61655	-4.21727	-11.93022	-8.91588	7.07493	-1.86945	7.54464	20.34802	-2.6485	0.08557	7.76342	4.63959	-6.33163	-1.80335	-3.8174	-0.34168	-4.63601	-2.58054	-6.5238	-5.03547	-1.28702	-3.99016	-1.03559	-2.10917	7.69034	2.21719	-0.17845	4.9276	3.30605	-0.85681	7.11682
4	4.72856	16.25736	22.57956	-3.00202	17.11863	22.61077	8.21717	-5.8661	20.7047	15.5999	-7.58331	-6.25507	-2.43078	-1.25174	-0.94922	-6.25331	-3.02864	-1.06156	-2.59357	-4.18475	-11.98016	-8.89466	7.06586	-1.75793	7.75521	20.08407	-2.72283	0.27606	7.67901	4.6251	-6.40203	-1.7238	-3.77933	-0.32489	-4.86385	-2.58349	-6.52605	-4.8629	-1.28835	-4.02087	-1.13956	-1.89619	7.7464	2.27878	-0.21548	4.96005	3.44433	-0.58162	7.04671
5	5.07345	16.04516	22.63256	-2.74295	17.50885	22.0373	8.31609	-5.20371	20.48802	15.83351	-7.55751	-6.34491	-2.44111	-1.34917	-0.89594	-6.19615	-3.00392	-1.11606	-2.57059	-4.15223	-12.0301	-8.87345	7.05678	-1.6464	7.96577	19.82011	-2.79716	0.46655	7.5946	4.61061	-6.47244	-1.64424	-3.74126	-0.3081	-5.09169	-2.58643	-6.52831	-4.69032	-1.28967	-4.05158	-1.24353	-1.68321	7.80247	2.34037	-0.25251	4.9925	3.58262	-0.30644	6.9766
6	5.41833	15.88196	22.68017	-2.48396	17.642	21.40669	8.48383	-4.51624	20.50363	16.09137	-7.53171	-6.43474	-2.30056	-1.42162	-0.84266	-6.139	-2.97919	-1.17056	-2.54762	-4.11971	-12.08004	-8.85224	6.59507	-1.56532	8.17633	19.55616	-2.87149	0.65704	7.51018	4.59613	-6.54284	-1.56468	-3.91207	-0.30539	-5.31953	-2.58938	-6.53057	-4.51775	-1.291	-4.08229	-1.3475	-1.47023	7.76127	2.3932	-0.28954	5.02495	3.72091	-0.03125	6.90649
7	5.76321	15.71875	22.72778	-2.22497	17.77514	20.77607	8.65157	-3.82876	20.51924	16.34924	-7.50591	-6.52458	-2.16002	-1.49407	-0.78938	-6.08185	-2.95447	-1.22505	-2.52464	-4.08719	-12.12999	-8.83102	6.13335	-1.48424	8.3869	19.2922	-2.94583	0.84754	7.42577	4.58164	-6.61324	-1.48512	-4.08288	-0.30267	-5.54737	-2.59232	-6.53283	-4.34518	-1.29232	-4.11299	-1.45147	-1.25724	7.72007	2.44602	-0.32657	5.0574	3.8592	0.24393	6.83637
8	6.45297	15.52419	22.82301	-1.46661	18.01532	19.51484	8.98704	-2.50731	20.56257	16.89157	-7.4543	-6.60158	-1.87893	-1.66107	-0.70575	-5.96754	-2.90503	-1.33024	-2.47869	-4.05493	-12.22987	-9.00719	5.20993	-1.74251	8.77724	18.76429	-3.09449	1.26995	7.25695	4.65249	-6.75404	-1.37948	-4.42451	-0.15587	-5.97806	-2.59821	-6.53734	-4.04853	-1.29497	-4.15238	-1.65941	-0.87532	7.63766	2.73158	-0.40572	5.12229	4.13577	0.72889	6.69615
9	6.60858	15.47815	22.86147	-0.99127	17.82582	18.87763	9.17319	-1.90118	20.58424	17.13375	-7.38638	-6.57849	-1.7614	-1.7534	-0.67528	-5.939	-2.91388	-1.36497	-2.45571	-4.05073	-12.13183	-9.22645	4.78421	-2.0398	8.66127	18.56744	-3.19953	1.44147	7.17254	4.68117	-6.66259	-1.35875	-4.55971	-0.02592	-5.98785	-2.63338	-6.53337	-4.04953	-1.2963	-4.11852	-1.47643	-0.71079	7.62062	2.94633	-0.40555	5.06306	4.14743	0.73201	6.62604
10	6.7642	15.43211	22.89992	-0.51593	17.63632	18.24042	9.35934	-1.29505	20.6059	17.37593	-7.31845	-6.55539	-1.64388	-1.84574	-0.64482	-5.91045	-2.92273	-1.3997	-2.43273	-4.04653	-12.03379	-9.4457	4.35848	-2.3371	8.54531	18.37058	-3.30457	1.61299	7.08813	4.70984	-6.57113	-1.33802	-4.69491	0.10403	-5.99763	-2.66855	-6.5294	-4.05053	-1.29762	-4.08465	-1.29345	-0.54625	7.60358	3.16108	-0.40537	5.00384	4.15909	0.73512	6.55593
11	6.91981	15.40658	22.86969	-0.03828	17.44682	17.59558	9.54493	-0.68892	20.64214	17.61812	-7.25052	-6.53229	-1.69896	-1.93573	-0.61435	-5.9091	-2.9286	-1.43443	-2.40975	-4.04232	-11.93575	-9.66495	4.2027	-2.67979	8.42935	18.11128	-3.41296	1.78451	7.00372	4.73851	-6.47967	-1.31729	-4.56304	0.23069	-6.00741	-2.71472	-6.53011	-4.05153	-1.29895	-4.05078	-1.11048	-0.38171	7.76777	3.33496	-0.40519	4.79869	4.16536	0.73824	6.48582
12	7.07543	15.38104	22.83946	0.43937	17.25732	16.95073	9.73052	-0.08278	20.67838	17.8603	-7.1826	-6.5092	-1.75404	-2.02573	-0.58389	-5.90775	-2.93446	-1.46916	-2.38678	-4.03812	-11.8377	-9.88421	4.04691	-3.02249	8.31338	17.85198	-3.52136	1.95603	6.91931	4.76719	-6.38821	-1.29656	-4.43116	0.35734	-6.0172	-2.76089	-6.53082	-4.05253	-1.30027	-4.01692	-0.9275	-0.21717	7.93196	3.50884	-0.40502	4.59353	4.17163	0.74136	6.41571
13	7.38665	15.37088	22.77901	1.39973	16.73975	15.66104	10.05374	0.90259	20.72623	18.24741	-7.04675	-6.57278	-1.8642	-2.2006	-0.62791	-5.90506	-2.94618	-1.53862	-2.34083	-4.02972	-11.64161	-10.32948	3.73534	-3.80691	8.02514	17.33339	-3.73816	2.29906	6.75049	4.82454	-6.2053	-1.3291	-4.16741	0.60346	-5.84167	-2.85322	-6.53224	-4.05453	-1.30292	-3.94919	-0.56154	-0.22762	8.26034	3.76744	-0.24786	4.18322	4.18416	0.74759	6.27549
14	7.54227	15.35384	22.71379	1.8799	16.45025	15.03949	10.17832	1.36572	20.75015	18.40078	-6.97883	-6.61372	-1.91311	-2.28804	-0.7024	-5.90371	-2.95204	-1.57335	-2.31785	-4.02552	-11.54357	-10.55268	3.5812	-4.19912	7.85286	17.0741	-3.84656	2.47058	6.66608	4.85322	-6.11384	-1.35153	-4.03167	0.72652	-5.65635	-2.89939	-6.53295	-4.05553	-1.30424	-3.91533	-0.37857	-0.26114	8.41824	3.89674	-0.09087	3.97807	4.19043	0.7507	6.20538
15	7.69788	15.3368	22.64857	2.36008	16.16075	14.41795	10.30289	1.82885	20.77408	18.55415	-6.91091	-6.65466	-1.96202	-2.37548	-0.77689	-5.90236	-2.9579	-1.60808	-2.29488	-4.02131	-11.44553	-10.77587	3.42705	-4.59134	7.68058	16.8148	-3.95496	2.6421	6.58166	4.88189	-6.02239	-1.37397	-3.89593	0.84959	-5.47103	-2.94556	-6.53366	-4.05653	-1.30557	-3.88146	-0.19559	-0.29465	8.57614	4.02604	0.06611	3.77291	4.1967	0.75382	6.13527
16	7.85349	15.32675	22.42005	2.84026	15.851	13.80665	10.42746	2.24784	20.66392	18.66535	-6.84299	-6.6956	-1.98212	-2.46292	-0.85137	-5.90102	-2.96377	-1.64281	-2.24836	-4.01711	-11.34748	-10.99907	3.28055	-4.98356	7.5083	16.55551	-4.06335	2.81362	6.44984	4.91057	-5.93093	-1.39641	-3.74216	0.97265	-5.28571	-2.99172	-6.53437	-4.05753	-1.36911	-3.84759	-0.01262	-0.32817	8.70469	4.15535	0.22309	3.56776	4.20297	0.75694	6.0218
17	8.00911	15.3167	22.19152	3.32043	15.54124	13.19534	10.55203	2.66683	20.55375	18.77655	-6.77506	-6.73654	-2.00223	-2.55036	-0.92586	-5.89967	-2.96963	-1.67754	-2.20183	-4.01291	-11.24944	-11.22227	3.13404	-5.37577	7.33601	16.29621	-4.17175	2.98514	6.31803	4.93924	-5.83947	-1.41884	-3.58839	1.09571	-5.10039	-3.03789	-6.53508	-4.05853	-1.43266	-3.81372	0.17036	-0.36168	8.83324	4.28465	0.38007	3.3626	4.20924	0.76005	5.90832
18	8.1395	15.23359	21.73447	4.28079	14.80844	11.97273	10.56829	3.22012	20.24041	18.7653	-6.60429	-6.81841	-2.04244	-2.72524	-1.07484	-5.89697	-2.98135	-1.747	-2.10666	-4.0045	-11.30614	-11.66866	2.84103	-6.16019	6.99145	15.77762	-4.38855	3.32817	6.00351	4.99659	-5.9122	-1.46371	-3.28086	1.34183	-4.72975	-3.13023	-6.5365	-4.06053	-1.55781	-3.74599	0.03545	-0.42872	9.09034	4.54325	0.69404	2.9523	4.22178	0.76629	5.65474
19	8.13469	15.15237	21.46381	4.42825	14.44204	11.43292	10.56164	3.49023	20.08374	18.7463	-6.51828	-6.83193	-2.02989	-2.64045	-1.14933	-5.89562	-2.98721	-1.78018	-2.05907	-3.9992	-11.35748	-11.72595	2.70498	-6.34433	6.81917	15.51832	-4.49695	3.48939	5.84625	5.00371	-5.95693	-1.53978	-3.16607	1.27256	-4.54443	-3.1764	-6.53721	-4.06415	-1.62039	-3.71086	-0.03413	-0.49654	9.13794	4.508	0.85102	2.74715	4.22804	0.76198	5.52796
20	8.12987	15.07115	21.19314	4.5757	14.07564	10.89311	10.555	3.76033	19.92707	18.72729	-6.43226	-6.84546	-2.01733	-2.55566	-1.22381	-5.89428	-2.99307	-1.81336	-2.01148	-3.99391	-11.40881	-11.78324	2.56892	-6.52847	6.64689	15.25902	-4.60535	3.65061	5.68899	5.01083	-6.00166	-1.61585	-3.05127	1.20328	-4.35911	-3.22256	-6.53792	-4.06778	-1.68296	-3.67572	-0.10372	-0.56436	9.18554	4.47275	1.008	2.54199	4.23431	0.75767	5.40117
21	8.12505	14.93228	20.78551	4.68156	13.64008	10.35979	10.48678	3.90025	19.67332	18.55219	-6.34625	-6.84332	-1.89863	-2.44934	-1.2276	-5.89293	-2.98696	-1.81728	-1.96389	-3.98775	-11.46015	-11.74573	2.46682	-6.68661	6.49261	14.99973	-4.66058	3.68178	5.53172	4.90229	-6.04639	-1.72256	-3.06315	1.10996	-4.2247	-3.26873	-6.53709	-4.09938	-1.74554	-3.6479	-0.1733	-0.65179	8.97006	4.41693	1.04593	2.33683	4.24864	0.69606	5.27438
22	8.12024	14.79341	20.37787	4.78742	13.20452	9.82646	10.41856	4.04016	19.41958	18.37708	-6.26024	-6.84118	-1.77992	-2.34302	-1.23138	-5.89158	-2.98084	-1.8212	-1.9163	-3.98158	-11.51148	-11.70821	2.36472	-6.84474	6.33832	14.74043	-4.71582	3.71294	5.37446	4.79374	-6.09112	-1.82928	-3.07502	1.01664	-4.09029	-3.3149	-6.53626	-4.13098	-1.80811	-3.62009	-0.24288	-0.73921	8.75458	4.36111	1.08385	2.13168	4.26296	0.63445	5.14759
23	8.11061	14.36376	19.56261	4.47325	12.26333	8.78362	10.066	4.18387	18.80516	17.96868	-6.08821	-6.85846	-1.54252	-2.14075	-1.20466	-5.86929	-2.97195	-1.79996	-1.82113	-3.98826	-11.61415	-11.68249	2.16051	-6.92914	6.03847	14.1637	-4.69375	3.71087	5.05994	4.75482	-6.18058	-2.00532	-3.09878	0.88619	-3.84615	-3.40067	-6.54405	-4.20017	-1.93326	-3.60326	-0.38205	-0.96425	8.32362	4.15834	1.10198	1.76912	4.17944	0.53767	4.89402
24	8.1058	14.00499	19.13351	4.30421	11.789	8.35651	9.88972	4.22172	18.49795	17.69827	-6.0022	-6.85816	-1.42381	-2.03985	-1.19131	-5.78562	-2.96751	-1.78935	-1.77354	-3.9916	-11.66549	-11.68738	2.05841	-6.96608	5.88855	13.68951	-4.68271	3.70983	4.90268	4.73536	-6.22532	-2.03137	-3.11065	0.82224	-3.72409	-3.41705	-6.54795	-4.23476	-1.99584	-3.59485	-0.45164	-1.0712	8.10814	4.05489	1.11104	1.7954	4.13768	0.48928	4.76723
25	8.10098	13.64622	18.70441	4.13517	11.31466	7.92941	9.71344	4.25957	18.19073	17.42787	-5.91618	-6.85787	-1.30511	-1.93895	-1.17795	-5.70194	-2.96307	-1.77873	-1.72595	-3.99494	-11.71682	-11.69228	1.95631	-7.00301	5.73863	13.21532	-4.67167	3.70879	4.74541	4.7159	-6.27005	-2.05741	-3.12253	0.75829	-3.60202	-3.43343	-6.55184	-4.26936	-2.05841	-3.58643	-0.52122	-1.17815	7.89266	3.95143	1.1201	1.82168	4.09592	0.44088	4.64044
26	8.09617	13.27119	18.22378	3.96613	10.75236	7.50004	9.47644	4.20904	17.85391	17.10797	-5.83017	-6.84646	-1.18641	-1.83804	-1.16449	-5.6323	-2.95863	-1.76811	-1.67836	-3.99828	-11.76816	-11.68701	1.85421	-7.03994	5.6452	12.85325	-4.66064	3.70775	4.58815	4.69644	-6.31478	-2.07174	-3.13441	0.69434	-3.61442	-3.44916	-6.55574	-4.30396	-2.12099	-3.57801	-0.5908	-1.26531	7.67718	3.84797	1.02863	1.88766	4.05416	0.39249	4.51366
27	8.09136	12.89616	17.74314	3.7971	10.19006	7.07067	9.23943	4.15851	17.51709	16.78807	-5.74416	-6.83504	-1.06771	-1.73714	-1.15102	-5.56266	-2.95418	-1.75749	-1.63077	-4.00162	-11.81949	-11.68174	1.75211	-7.07687	5.55177	12.49118	-4.6496	3.70671	4.43089	4.67697	-6.35951	-2.08607	-3.14628	0.63038	-3.62683	-3.46488	-6.55963	-4.33856	-2.18356	-3.5696	-0.66038	-1.35247	7.4617	3.74451	0.93716	1.95363	4.01241	0.3441	4.38687
28	8.08173	11.91382	16.78187	3.45902	9.06545	6.24724	8.72502	4.03925	16.77649	16.13487	-5.57213	-6.81221	-0.83031	-1.53534	-1.12409	-5.42338	-2.94529	-1.73625	-1.5356	-4.0083	-11.92216	-11.67121	1.5479	-7.15074	5.36492	11.76703	-4.62753	3.70463	4.11636	4.63805	-6.44897	-2.11474	-3.17004	0.50248	-3.65164	-3.49632	-6.56741	-4.40775	-2.30872	-3.55278	-0.79955	-1.52679	7.03074	3.5376	0.75423	2.08558	3.92889	0.24732	4.13329
29	8.07691	11.42742	16.31322	3.2855	8.52523	5.87194	8.49827	3.96767	16.40202	15.80381	-5.48612	-6.8008	-0.73014	-1.45996	-1.11063	-5.35374	-2.94085	-1.72563	-1.48801	-4.01164	-11.9735	-11.66594	1.46978	-7.17756	5.27149	11.40496	-4.6165	3.7036	3.9591	4.61859	-6.49371	-2.12907	-3.19556	0.46269	-3.66405	-3.51204	-6.5713	-4.44235	-2.37129	-3.54437	-0.86913	-1.61395	6.79664	3.42871	0.66276	2.15155	3.88713	0.19893	4.0065
30	8.0721	10.94103	15.84456	3.11198	7.985	5.49664	8.27153	3.89609	16.02755	15.47274	-5.40011	-6.78938	-0.62997	-1.38458	-1.09716	-5.28409	-2.93641	-1.71501	-1.44042	-4.01498	-12.02483	-11.66067	1.39165	-7.20439	5.17807	11.04289	-4.60546	3.70256	3.80184	4.59913	-6.53844	-2.14341	-3.22107	0.42289	-3.67646	-3.52777	-6.5752	-4.47695	-2.43387	-3.53595	-0.93871	-1.70111	6.56254	3.31982	0.57129	2.21752	3.84537	0.15054	3.87972
31	8.06729	10.44751	15.39786	2.92278	7.43253	5.12334	8.05389	3.83075	15.66773	15.15062	-5.3141	-6.81019	-0.56378	-1.39853	-1.0837	-5.21445	-2.93196	-1.70439	-1.39034	-4.01832	-12.07617	-11.62831	1.35748	-7.19584	5.08465	10.68081	-4.59442	3.70152	3.70098	4.57967	-6.58317	-2.154	-3.27159	0.46763	-3.68886	-3.54349	-6.57909	-4.51154	-2.45831	-3.52754	-1.00829	-1.78234	6.2943	3.19193	0.47982	2.2835	3.80361	0.10215	3.81732
32	8.06247	9.954	14.95116	2.73358	6.88007	4.75003	7.83624	3.76541	15.30791	14.82849	-5.22808	-6.831	-0.4976	-1.41248	-1.07023	-5.14481	-2.92752	-1.69377	-1.34027	-4.02166	-12.1275	-11.59594	1.32331	-7.18729	4.99122	10.31874	-4.58339	3.70048	3.60012	4.5602	-6.6279	-2.16458	-3.32211	0.51238	-3.70127	-3.55921	-6.58299	-4.54614	-2.48274	-3.51912	-1.07788	-1.86357	6.02606	3.06404	0.38835	2.34947	3.76185	0.05375	3.75493
33	8.05284	9.01904	14.05776	2.46421	5.84924	3.97986	7.40095	3.60904	14.57672	14.25574	-5.05606	-6.88694	-0.36523	-1.44964	-1.09918	-5.00552	-2.91863	-1.65434	-1.25286	-4.09838	-12.23017	-11.51916	1.25497	-7.20181	4.83594	9.5946	-4.56132	3.87108	3.4	4.88299	-6.71736	-2.18409	-3.42315	0.56514	-3.70508	-3.59065	-6.59078	-4.49038	-2.54564	-3.49597	-1.21705	-2.02339	5.48959	2.87633	0.28862	2.48142	3.67833	0.00023	3.68899
34	7.9436	8.56657	13.64238	2.40039	5.4146	3.58985	7.30726	3.59877	14.20615	14.0209	-5.09958	-6.91491	-0.32714	-1.47424	-1.143	-4.93588	-2.92525	-1.64959	-1.21297	-4.15536	-12.25768	-11.48078	1.19961	-7.22963	4.77488	9.23252	-4.67422	3.95291	3.29349	4.93444	-6.7298	-2.19384	-3.46309	0.56764	-3.69596	-3.60637	-6.6089	-4.45679	-2.58561	-3.45116	-1.20375	-2.1033	5.30556	2.82672	0.28243	2.54739	3.62026	0.00265	3.66432
35	7.83436	8.11409	13.227	2.33657	4.97995	3.19983	7.21357	3.5885	13.83559	13.78606	-5.1431	-6.94288	-0.28905	-1.49884	-1.18682	-4.86624	-2.93188	-1.64483	-1.17307	-4.21233	-12.28519	-11.44239	1.14424	-7.25744	4.71382	8.87045	-4.78712	4.03474	3.18697	4.98589	-6.74224	-2.20359	-3.50302	0.57014	-3.68683	-3.6221	-6.62702	-4.42319	-2.62559	-3.40636	-1.19045	-2.18321	5.12153	2.77711	0.27625	2.61337	3.56219	0.00506	3.63966
36	7.73127	7.69966	12.85637	2.27276	4.5479	2.81626	7.12292	3.56354	13.46468	13.57145	-5.22097	-7.00777	-0.29109	-1.52344	-1.23064	-4.7966	-2.92542	-1.64007	-1.13318	-4.2693	-12.32276	-11.34514	1.05858	-7.28525	4.65276	8.50838	-4.93983	4.11657	3.08046	5.03735	-6.76392	-2.17453	-3.52783	0.57265	-3.67771	-3.63782	-6.63708	-4.38959	-2.66556	-3.36155	-1.20111	-2.25969	5.05779	2.7275	0.27006	2.67934	3.55165	0.00747	3.615
37	7.62817	7.28524	12.48573	2.20894	4.11584	2.43268	7.03227	3.53858	13.09377	13.35684	-5.29884	-7.07267	-0.29314	-1.54804	-1.27446	-4.72696	-2.91897	-1.63531	-1.09329	-4.32628	-12.36033	-11.24789	0.97292	-7.31306	4.59169	8.1463	-5.09254	4.1984	2.97395	5.0888	-6.7856	-2.14546	-3.55265	0.57515	-3.66858	-3.65354	-6.64714	-4.35599	-2.70553	-3.31674	-1.21176	-2.33616	4.99405	2.6779	0.26387	2.74531	3.5411	0.00988	3.59033
38	7.42198	6.51641	11.74446	2.08131	3.45282	1.56155	6.89351	3.46649	12.37445	13.00348	-5.45457	-7.25785	-0.29723	-1.59724	-1.35484	-4.71669	-2.90606	-1.62579	-1.0135	-4.44023	-12.43546	-10.96511	0.80161	-7.36868	4.5084	8.06725	-5.39796	4.36206	2.76092	5.1917	-6.82897	-2.02911	-3.60228	0.58015	-3.6381	-3.69927	-6.66726	-4.2888	-2.78547	-3.22713	-1.23307	-2.48395	4.86658	2.57869	0.21341	2.68637	3.52002	0.0147	3.541
39	7.31889	6.16779	11.41308	2.0175	3.17132	1.11891	6.88199	3.42192	12.0305	12.85304	-5.53244	-7.35044	-0.29927	-1.62184	-1.3914	-4.72835	-2.89961	-1.62103	-0.97361	-4.4972	-12.47303	-10.82372	0.71596	-7.39649	4.48617	8.06393	-5.55067	4.44389	2.65441	5.24315	-6.85065	-1.97093	-3.62709	0.58265	-3.61674	-3.72941	-6.67732	-4.2552	-2.82544	-3.18232	-1.24373	-2.55784	4.80284	2.52909	0.16913	2.64135	3.50948	0.01711	3.51633
40	7.2158	5.81918	11.08171	1.95368	2.88982	0.67628	6.87047	3.37735	11.68655	12.7026	-5.61031	-7.44303	-0.30131	-1.64644	-1.42795	-4.74001	-2.89315	-1.61627	-0.93371	-4.55418	-12.5106	-10.68233	0.6303	-7.42431	4.46394	8.06061	-5.70337	4.52572	2.54789	5.29461	-6.87233	-1.91275	-3.65191	0.58515	-3.59539	-3.75955	-6.68737	-4.2216	-2.86541	-3.13752	-1.25438	-2.63173	4.7391	2.47948	0.12485	2.59633	3.49893	0.01952	3.49167
41	7.11271	5.50939	10.79451	1.89883	2.61785	0.2424	6.862	3.29679	11.31489	12.56701	-5.68818	-7.53562	-0.30336	-1.66212	-1.4645	-4.74982	-2.8867	-1.61151	-0.89382	-4.61116	-12.54817	-10.54094	0.54465	-7.4363	4.4417	7.99436	-5.85608	4.60755	2.44137	5.34606	-6.89401	-1.85458	-3.67673	0.56854	-3.57404	-3.79559	-6.69743	-4.188	-2.90538	-3.09272	-1.26504	-2.70563	4.67536	2.49458	0.08058	2.5645	3.48839	0.02193	3.46701
42	7.00961	5.19961	10.50731	1.84397	2.34589	-0.19149	6.85353	3.21624	10.94323	12.43142	-5.76604	-7.62821	-0.3054	-1.67779	-1.50105	-4.75964	-2.88024	-1.60675	-0.85392	-4.66813	-12.58574	-10.39955	0.45899	-7.4483	4.41947	7.9281	-6.00879	4.68939	2.33486	5.39752	-6.91569	-1.7964	-3.70154	0.55192	-3.55268	-3.83162	-6.70749	-4.1544	-2.94535	-3.04791	-1.27569	-2.77952	4.61163	2.50969	0.0363	2.53266	3.47784	0.02434	3.44234
43	6.80342	4.66259	9.9329	1.74861	2.01807	-1.05561	6.74988	2.85513	10.21074	12.22473	-5.92178	-7.7404	-0.30949	-1.69486	-1.57416	-4.77928	-2.86733	-1.59724	-0.77413	-4.78208	-12.66088	-10.1902	0.28768	-7.447	4.37501	7.79558	-6.31421	4.85305	2.12184	5.50042	-6.95905	-1.72044	-3.75117	0.48812	-3.50996	-3.90368	-6.72761	-4.08721	-3.0253	-2.9583	-1.297	-2.96767	4.48415	2.64343	-0.05226	2.46899	3.45676	0.02916	3.39301
44	6.70032	4.4306	9.68656	1.56039	1.85201	-1.48071	6.74572	2.6339	9.904	12.12196	-5.99965	-7.7965	-0.27105	-1.68852	-1.60332	-4.7891	-2.86088	-1.60792	-0.73423	-4.82038	-12.69845	-10.08553	0.1028	-7.41113	4.35081	7.72932	-6.46692	4.83766	2.01532	5.5322	-6.98073	-1.68246	-3.74904	0.45027	-3.48927	-3.93972	-6.73767	-4.08779	-3.06527	-2.93074	-1.30766	-3.06175	4.43726	2.64556	-0.09914	2.43715	3.44622	0.13685	3.36834
45	6.59723	4.19862	9.44023	1.37217	1.68596	-1.90581	6.74155	2.41267	9.59725	12.01918	-6.07751	-7.85259	-0.23262	-1.68218	-1.63248	-4.79892	-2.85442	-1.61859	-0.69434	-4.85867	-12.73601	-9.98086	-0.08209	-7.37527	4.32662	7.66306	-6.61963	4.82228	1.90881	5.56398	-7.00241	-1.64448	-3.74692	0.41241	-3.46857	-3.97575	-6.74773	-4.08837	-3.10524	-2.90319	-1.31831	-3.15582	4.39036	2.6477	-0.14602	2.40532	3.43567	0.24454	3.34368
46	6.49414	3.98808	9.23023	1.17057	1.5544	-2.30272	6.66657	2.10251	9.25124	11.92748	-6.15538	-7.90869	-0.1582	-1.67443	-1.62572	-4.80874	-2.82339	-1.63068	-0.67375	-4.86705	-12.77358	-9.87619	-0.35517	-7.33605	4.29288	7.5968	-6.70956	4.74815	1.81922	5.61735	-7.02409	-1.6065	-3.72085	0.37399	-3.45106	-4.01178	-6.76421	-4.09938	-3.16137	-2.90646	-1.32897	-3.2499	4.35844	2.64367	-0.20557	2.37349	3.40738	0.38495	3.31743
47	6.39104	3.77754	9.02022	0.96897	1.42283	-2.69962	6.5916	1.79236	8.90523	11.83578	-6.23325	-7.96478	-0.08379	-1.66668	-1.61895	-4.81856	-2.79236	-1.64277	-0.65316	-4.87543	-12.81115	-9.77152	-0.62825	-7.29683	4.25914	7.53054	-6.7995	4.67401	1.72963	5.67071	-7.04577	-1.56851	-3.69479	0.33556	-3.43355	-4.04781	-6.78068	-4.11039	-3.21749	-2.90973	-1.33962	-3.34397	4.32651	2.63964	-0.26511	2.34165	3.37909	0.52537	3.29118
48	6.18485	3.40432	8.60021	0.56576	1.24952	-3.33934	6.44728	1.00963	8.18376	11.65785	-6.38898	-7.9023	0.06505	-1.65117	-1.60542	-4.8382	-2.67116	-1.66252	-0.62644	-4.84118	-12.88629	-9.78631	-1.17442	-7.21839	4.19166	7.39803	-6.65975	4.45397	1.56314	5.82987	-7.08913	-1.59367	-3.64266	0.25872	-3.39854	-4.11987	-6.82221	-4.13721	-3.34186	-2.9698	-1.36093	-3.51623	4.26266	2.63158	-0.38419	2.27798	3.25334	0.82209	3.2375
49	6.08175	3.23729	8.40964	0.36416	1.16018	-3.65479	6.39412	0.61579	7.92957	11.55795	-6.46685	-7.75463	0.15119	-1.64342	-1.59865	-4.84802	-2.60927	-1.67239	-0.64172	-4.82405	-12.92386	-9.94313	-1.41713	-7.17918	4.15792	7.33177	-6.56484	4.34395	1.59998	5.90945	-7.11081	-1.67366	-3.62025	0.2203	-3.38103	-4.1559	-6.84242	-4.15062	-3.37667	-2.99984	-1.37159	-3.59176	4.19787	2.62755	-0.44373	2.24614	3.18612	0.97045	3.25885
50	5.97866	3.07025	8.21906	0.16256	1.07083	-3.97024	6.34096	0.22195	7.67539	11.45805	-6.54472	-7.60695	0.23732	-1.63566	-1.59189	-4.85784	-2.54738	-1.68227	-0.65699	-4.80692	-12.96142	-10.09996	-1.65983	-7.13996	4.12417	7.26551	-6.46993	4.23393	1.63681	5.98903	-7.13249	-1.75364	-3.59784	0.18187	-3.36352	-4.19194	-6.86263	-4.16402	-3.41148	-3.02987	-1.38224	-3.66728	4.13308	2.62351	-0.50328	2.21431	3.1189	1.11882	3.2802
51	5.80985	2.89867	8.04209	-0.03904	1.05079	-4.20782	6.24905	-0.222	7.42717	11.37932	-6.63762	-7.45927	0.33166	-1.62791	-1.54997	-4.85311	-2.48549	-1.69215	-0.67322	-4.78979	-12.93638	-10.25678	-1.88128	-7.10074	4.11221	7.18249	-6.37501	4.12392	1.67765	6.06861	-7.10089	-1.83363	-3.57799	0.14345	-3.31952	-4.1906	-6.88284	-4.17742	-3.44538	-3.0599	-1.41931	-3.74281	4.04529	2.61948	-0.55658	2.21402	3.05168	1.26718	3.30316
52	5.64104	2.72709	7.86513	-0.24065	1.03076	-4.44541	6.15714	-0.66595	7.17895	11.30058	-6.73051	-7.3116	0.426	-1.62016	-1.50804	-4.84838	-2.4236	-1.70202	-0.68945	-4.77266	-12.91134	-10.4136	-2.10272	-7.06152	4.10024	7.09947	-6.2801	4.0139	1.71848	6.14819	-7.06929	-1.91362	-3.55814	0.10503	-3.27552	-4.18925	-6.90306	-4.19083	-3.47927	-3.08994	-1.45638	-3.81834	3.95751	2.61545	-0.60987	2.21374	2.98446	1.41554	3.32612
53	5.15351	2.47544	7.5112	-0.55811	0.99916	-4.73362	6.04278	-1.45002	6.68462	11.06781	-6.93602	-7.01463	0.61467	-1.6024	-1.42419	-4.80255	-2.29982	-1.72177	-0.72191	-4.7384	-12.82196	-10.70971	-2.5456	-7.09182	4.07631	6.89152	-6.09027	3.79386	1.80015	6.30735	-6.90238	-2.06009	-3.51844	0.02487	-3.18752	-4.09312	-6.94348	-4.21764	-3.54706	-3.15001	-1.60105	-3.95988	3.78193	2.56496	-0.71645	2.29204	2.85002	1.71227	3.37204
54	4.90975	2.32667	7.31287	-0.68803	1.00419	-4.87284	6.02774	-1.79482	6.51517	10.96498	-7.03878	-6.8625	0.70901	-1.62011	-1.38227	-4.74493	-2.23793	-1.73164	-0.73813	-4.72127	-12.77727	-10.81828	-2.76705	-7.07856	4.06434	6.96571	-5.99536	3.68384	1.84098	6.38693	-6.81892	-2.10294	-3.49859	0.01335	-3.14352	-4.0442	-6.96369	-4.23104	-3.58096	-3.18005	-1.67339	-4.00924	3.69414	2.50908	-0.76975	2.24832	2.78281	1.86063	3.395
55	4.66599	2.17791	7.11454	-0.81795	1.00921	-5.01207	6.01271	-2.13962	6.34572	10.86216	-7.14153	-6.71036	0.80335	-1.63782	-1.34034	-4.68732	-2.17604	-1.74152	-0.75436	-4.70414	-12.73257	-10.92685	-2.98849	-7.0653	4.05237	7.0399	-5.90045	3.57383	1.88182	6.46651	-6.73546	-2.14579	-3.47874	0.00183	-3.09952	-3.99528	-6.98391	-4.24445	-3.61485	-3.21009	-1.74572	-4.0586	3.60636	2.45319	-0.82304	2.2046	2.71559	2.00899	3.41796
56	4.42223	2.07216	6.90456	-0.9114	1.02481	-5.06509	6.02731	-2.37514	6.2564	10.74415	-7.24428	-6.55823	0.89769	-1.69712	-1.29842	-4.61078	-2.11415	-1.73138	-0.77059	-4.65898	-12.68788	-11.03543	-3.20993	-6.99726	4.0404	7.21128	-5.80553	3.47036	1.92266	6.4382	-6.652	-2.18864	-3.45889	0.03503	-3.05552	-3.9459	-7.00413	-4.29629	-3.64874	-3.23531	-1.81806	-4.10796	3.51857	2.35377	-0.87633	2.11568	2.64837	2.02923	3.44092
57	4.17846	1.96641	6.69459	-1.00485	1.04042	-5.11811	6.0419	-2.61066	6.16708	10.62614	-7.34704	-6.40609	0.99203	-1.75641	-1.25649	-4.53423	-2.05226	-1.72124	-0.78682	-4.61383	-12.64319	-11.144	-3.43138	-6.92923	4.02844	7.38265	-5.71062	3.36689	1.96349	6.40989	-6.56855	-2.23149	-3.43904	0.06824	-3.01152	-3.89652	-7.02434	-4.34813	-3.68263	-3.26053	-1.89039	-4.15731	3.43078	2.25435	-0.92962	2.02676	2.58115	2.04948	3.46388
58	3.69094	1.8331	6.27463	-1.19174	1.11072	-5.14058	6.05858	-3.01964	6.04154	10.36138	-7.55255	-6.10181	1.1807	-1.875	-1.24773	-4.38114	-1.92848	-1.68094	-0.81928	-4.4955	-12.5538	-11.36115	-3.87426	-6.79317	4.2969	7.72539	-5.5208	3.16651	2.04516	6.24538	-6.40163	-2.31719	-3.39934	0.13466	-2.93684	-3.79775	-7.06476	-4.49024	-3.75042	-3.30616	-2.03506	-4.25602	3.2552	2.05551	-0.95798	1.84891	2.44671	1.96186	3.50979
59	3.44717	1.78892	6.01148	-1.28519	1.11386	-5.13043	6.23414	-3.01615	6.02469	10.26214	-7.65531	-5.99164	1.17895	-1.9343	-1.24979	-4.30459	-1.91327	-1.66219	-0.83551	-4.43958	-12.50911	-11.41923	-3.90629	-6.72513	4.4562	7.89676	-5.46854	3.1307	2.086	6.21035	-6.31818	-2.33772	-3.42927	0.16787	-2.90064	-3.74837	-7.06617	-4.53684	-3.78432	-3.30617	-2.1074	-4.28173	3.19108	1.95609	-0.96545	1.75999	2.47354	1.77118	3.53275
60	3.20341	1.74475	5.74833	-1.37864	1.11699	-5.12028	6.40969	-3.01266	6.00784	10.1629	-7.75806	-5.88147	1.1772	-1.99359	-1.25185	-4.22804	-1.89805	-1.64343	-0.85174	-4.38366	-12.46442	-11.47731	-3.93832	-6.6571	4.6155	8.06813	-5.41627	3.09489	2.12683	6.17532	-6.23472	-2.35825	-3.4592	0.20108	-2.86444	-3.69898	-7.06758	-4.58345	-3.81821	-3.30617	-2.17973	-4.30744	3.12696	1.85668	-0.97292	1.67107	2.50038	1.5805	3.55571
61	2.95965	1.80478	5.46303	-1.47209	1.11694	-5.05289	6.52561	-2.97307	6.12317	10.07838	-7.86082	-5.87621	1.13542	-2.05288	-1.25391	-4.1515	-1.92777	-1.62467	-0.88025	-4.32774	-12.41973	-11.40915	-3.89143	-6.58907	4.7748	8.2395	-5.41332	3.05909	2.19761	6.1403	-6.15126	-2.32298	-3.50987	0.23429	-2.82824	-3.6496	-7.05659	-4.63005	-3.8116	-3.30617	-2.25207	-4.27404	3.07271	1.75726	-0.98039	1.58215	2.51757	1.38983	3.61896
62	2.71588	1.86481	5.17772	-1.56553	1.11688	-4.9855	6.64153	-2.93348	6.23851	9.99386	-7.96357	-5.87095	1.09363	-2.11218	-1.25597	-4.07495	-1.95748	-1.60592	-0.90876	-4.27181	-12.37504	-11.34099	-3.84454	-6.52104	4.93409	8.41087	-5.41037	3.02328	2.26839	6.10527	-6.0678	-2.28771	-3.56053	0.2675	-2.79203	-3.60021	-7.0456	-4.67665	-3.80498	-3.30618	-2.3244	-4.24064	3.01845	1.65784	-0.98786	1.49322	2.53477	1.19915	3.68221
63	2.22836	2.04475	4.60711	-1.77789	1.03857	-4.83864	6.96225	-2.75402	6.57105	9.83648	-8.16908	-5.86043	1.01006	-2.22304	-1.35712	-3.92186	-2.01691	-1.5684	-0.97982	-4.15997	-12.28565	-11.20468	-3.75076	-6.37614	5.32741	8.75362	-5.40447	2.95166	2.44417	6.03522	-5.90089	-2.21716	-3.66186	0.31242	-2.82335	-3.50145	-7.02362	-4.76985	-3.74544	-3.30619	-2.46907	-4.17383	2.90993	1.4083	-0.89382	1.31537	2.56915	0.8178	3.85475
64	1.9846	2.24436	4.31837	-1.92862	0.96481	-4.71757	7.14058	-2.62528	6.75856	9.85514	-8.27183	-5.83451	0.91577	-2.26494	-1.45622	-3.84816	-2.04662	-1.54964	-1.01535	-4.10405	-12.24096	-11.13515	-3.7566	-6.28824	5.56144	8.92632	-5.40152	2.91585	2.53206	6.00019	-5.81743	-2.18471	-3.67761	0.29724	-2.89086	-3.46605	-7.01262	-4.81645	-3.71567	-3.3062	-2.54141	-4.08342	2.79667	1.19481	-0.79231	1.22346	2.58635	0.62712	3.94102
65	1.74083	2.44397	4.02963	-2.07934	0.89106	-4.59649	7.3189	-2.49653	6.94608	9.8738	-8.37459	-5.8086	0.82148	-2.30684	-1.55531	-3.77446	-2.07633	-1.53089	-1.05088	-4.04812	-12.19627	-11.06561	-3.76244	-6.20035	5.79546	9.09902	-5.39858	2.88004	2.61995	5.96516	-5.73397	-2.15227	-3.69337	0.28207	-2.95838	-3.43065	-7.00163	-4.86306	-3.6859	-3.30621	-2.61375	-3.99301	2.68341	0.98132	-0.69081	1.13155	2.60354	0.43645	4.02729
66	1.49707	2.73428	3.73984	-2.09334	0.77046	-4.43987	7.47454	-2.36895	7.26881	9.90209	-8.47734	-5.74654	0.71103	-2.29594	-1.65441	-3.72352	-2.10604	-1.51214	-1.08642	-3.9922	-12.15158	-10.99367	-3.7845	-6.19743	6.02949	9.28235	-5.39563	2.84424	2.70784	5.93013	-5.65052	-2.12476	-3.69839	0.19128	-3.0259	-3.50711	-6.99064	-4.90966	-3.65613	-3.30621	-2.68609	-3.80284	2.55199	0.92365	-0.5893	1.01574	2.62073	0.24577	4.11356
67	1.2533	3.02458	3.45005	-2.10733	0.64987	-4.28324	7.63018	-2.24137	7.59154	9.93039	-8.5801	-5.68448	0.60059	-2.28505	-1.75351	-3.67258	-2.13576	-1.49338	-1.12195	-3.93628	-12.10688	-10.92173	-3.80657	-6.1945	6.26351	9.46569	-5.39268	2.80843	2.79573	5.89511	-5.56706	-2.09725	-3.7034	0.10048	-3.09342	-3.58358	-6.97965	-4.95626	-3.62636	-3.30622	-2.75842	-3.61266	2.42058	0.86597	-0.4878	0.89994	2.63792	0.0551	4.19983
68	1.39962	3.69207	2.87046	-2.09431	0.38194	-3.97	7.86143	-2.12753	8.34526	10.12785	-8.57534	-5.56036	0.37971	-2.24742	-1.9517	-3.5707	-2.19519	-1.54017	-1.19301	-3.87245	-12.34898	-10.77785	-3.8507	-6.21414	6.73156	9.83236	-5.38678	2.77795	2.97151	5.83937	-5.47337	-2.04223	-3.71343	-0.10379	-3.22845	-3.73652	-6.95766	-4.96063	-3.56682	-3.33804	-2.75279	-3.23231	2.15775	0.79737	-0.28479	0.66832	2.67231	-0.20873	4.37237
69	1.74977	4.17303	2.67396	-2.08779	0.2125	-3.69439	7.96183	-2.09752	8.72583	10.29774	-8.42496	-5.4983	0.26926	-2.2286	-2.04643	-3.57015	-2.22491	-1.60189	-1.22854	-3.86237	-12.49579	-10.70592	-3.87276	-6.22396	6.88042	9.93729	-5.38383	2.78141	3.0594	5.818	-5.58641	-2.01472	-3.71845	-0.20593	-3.28632	-3.82	-6.94667	-4.92243	-3.53705	-3.36841	-2.60677	-3.04214	2.02634	0.76307	-0.2102	0.64081	2.6895	-0.28723	4.45864
70	2.09992	4.65399	2.47747	-2.08128	0.04306	-3.41877	8.06224	-2.06751	9.10639	10.46763	-8.27458	-5.43624	0.15882	-2.20979	-2.14115	-3.5696	-2.25462	-1.6636	-1.26407	-3.85229	-12.64259	-10.63398	-3.89483	-6.23378	7.02927	10.04222	-5.38088	2.78487	3.14729	5.79663	-5.69945	-1.98721	-3.72346	-0.30806	-3.34419	-3.90348	-6.93568	-4.88423	-3.50728	-3.39878	-2.46075	-2.85196	1.89492	0.72878	-0.13561	0.61329	2.70669	-0.36572	4.54491
71	2.45735	5.14246	2.30097	-2.07477	-0.12327	-3.02323	8.0928	-2.10796	9.60915	10.63987	-8.12031	-5.37417	0.04837	-2.19098	-2.2321	-3.57984	-2.30102	-1.73739	-1.2996	-3.89824	-12.79008	-10.56204	-3.91689	-6.2436	7.10458	10.13035	-5.38248	2.81059	3.23518	5.75056	-5.8167	-1.9597	-3.72848	-0.41019	-3.39372	-3.98846	-6.92992	-4.84758	-3.47751	-3.40128	-2.31096	-2.66179	1.7635	0.69448	-0.08427	0.6047	2.71136	-0.37406	4.63118
72	2.81479	5.63094	2.12447	-2.06825	-0.28959	-2.62768	8.12337	-2.1484	10.11192	10.8121	-7.96604	-5.31211	-0.06207	-2.17217	-2.32304	-3.59008	-2.34742	-1.81117	-1.33513	-3.94419	-12.93756	-10.4901	-3.93896	-6.25341	7.17988	10.21848	-5.38408	2.83631	3.32307	5.7045	-5.93395	-1.93219	-3.73349	-0.51233	-3.44326	-4.07344	-6.92417	-4.81092	-3.44774	-3.40379	-2.16118	-2.47161	1.63209	0.66018	-0.03292	0.59611	2.71602	-0.3824	4.71745
73	3.52966	6.88688	1.77147	-2.05523	-0.55381	-1.8366	8.06014	-2.40772	11.2184	11.25943	-7.65749	-5.18799	-0.28295	-2.13454	-2.50494	-3.61057	-2.45248	-1.98286	-1.40619	-4.14814	-13.23253	-10.34622	-3.98309	-6.27305	7.33049	10.39475	-5.31571	2.93226	3.49885	5.56298	-6.16844	-1.87717	-3.74351	-0.71659	-3.54233	-4.24341	-6.9319	-4.74068	-3.3882	-3.35309	-1.8616	-2.09126	1.36926	0.59158	0.06977	0.57893	2.74423	-0.25878	4.88999
74	3.8871	7.53581	1.77448	-1.93833	-0.68166	-1.19022	8.03897	-2.53738	11.77164	11.4831	-7.50322	-5.12593	-0.30072	-2.13273	-2.59589	-3.62082	-2.48983	-2.06871	-1.44172	-4.25011	-13.38002	-10.27428	-3.9829	-6.31007	7.4058	10.48288	-5.22354	2.98023	3.58674	5.49222	-6.28569	-1.84966	-3.69731	-0.72002	-3.59186	-4.32839	-6.94206	-4.70557	-3.35843	-3.32773	-1.71181	-1.90109	1.36341	0.68327	0.12112	0.57034	2.78991	-0.19697	4.97626
75	4.24454	8.18475	1.77749	-1.82144	-0.80951	-0.54383	8.01779	-2.66704	12.32487	11.70677	-7.34894	-5.06387	-0.31849	-2.13092	-2.68683	-3.63106	-2.52718	-2.15456	-1.47726	-4.35209	-13.5275	-10.20234	-3.98271	-6.3471	7.48111	10.57101	-5.13138	3.0282	3.67463	5.42146	-6.40294	-1.82215	-3.6511	-0.72346	-3.64139	-4.41337	-6.95223	-4.67045	-3.32866	-3.30238	-1.56202	-1.71091	1.35757	0.77496	0.17246	0.56174	2.83558	-0.13515	5.06253
76	4.60197	8.92267	1.80444	-1.6402	-0.80993	0.25966	7.87888	-2.8093	12.96786	11.92427	-7.19467	-5.00181	-0.3239	-2.167	-2.67717	-3.6413	-2.56453	-2.24041	-1.51279	-4.45407	-13.67499	-10.1304	-3.97955	-6.42253	7.51554	10.65914	-5.03922	3.07618	3.76252	5.3507	-6.52018	-1.79464	-3.59807	-0.60429	-3.60065	-4.49835	-6.96239	-4.63533	-3.29889	-3.27703	-1.41223	-1.52073	1.36847	0.92751	0.10297	0.55315	2.88126	-0.07334	5.1488
77	4.95941	9.6606	1.83138	-1.45897	-0.81036	1.06315	7.73997	-2.95155	13.61085	12.14176	-7.0404	-4.93975	-0.32931	-2.20307	-2.66751	-3.65154	-2.60188	-2.32625	-1.54832	-4.55605	-13.82247	-10.05846	-3.97639	-6.49797	7.54998	10.74727	-4.94705	3.12415	3.85041	5.27994	-6.63743	-1.76713	-3.54503	-0.48512	-3.5599	-4.58333	-6.97256	-4.60022	-3.26912	-3.25168	-1.26245	-1.33056	1.37937	1.08005	0.03347	0.54456	2.92694	-0.01153	5.23507
78	5.67429	11.24907	1.88526	-1.18634	-0.68244	2.67013	7.54705	-3.2253	15.00166	12.55569	-6.73185	-4.81562	-0.34013	-2.3663	-2.64819	-3.67203	-2.67658	-2.49795	-1.61938	-4.76	-14.11744	-9.91458	-3.97006	-6.71125	7.61885	10.92353	-4.76272	3.2201	4.02619	5.13842	-6.87193	-1.71211	-3.43896	-0.08311	-3.47841	-4.75329	-6.9929	-4.52998	-3.20958	-3.20097	-0.96287	-0.95022	1.40117	1.23537	-0.10552	0.52737	3.01829	0.11209	5.40761
79	6.03172	12.08078	2.08118	-1.05003	-0.531	3.86598	7.42502	-3.27068	15.69706	12.76339	-6.57758	-4.75356	-0.31596	-2.44792	-2.63853	-3.72064	-2.71393	-2.55795	-1.65491	-4.8679	-14.26493	-9.84265	-3.73778	-6.81789	7.65329	11.05922	-4.67056	3.2984	4.11408	5.10657	-6.98917	-1.6846	-3.4302	0.1179	-3.43767	-4.72666	-7.00306	-4.49388	-3.17981	-3.15452	-0.81309	-0.76004	1.57135	1.31303	-0.17501	0.55251	3.06397	0.15804	5.49389
80	6.38916	12.9125	2.2771	-0.91371	-0.37956	5.06183	7.30298	-3.31607	16.39246	12.97108	-6.42331	-4.6915	-0.29179	-2.52953	-2.62887	-3.76925	-2.75128	-2.61795	-1.69044	-4.9758	-14.41241	-9.77071	-3.5055	-6.92453	7.68772	11.19491	-4.57839	3.37669	4.20197	5.07472	-7.10642	-1.65709	-3.42144	0.3189	-3.39692	-4.70002	-7.01323	-4.45778	-3.15004	-3.10807	-0.6633	-0.56987	1.74152	1.39069	-0.2445	0.57765	3.10965	0.204	5.58016
81	6.7466	13.82936	2.48358	-0.7774	-0.13878	6.35699	7.1709	-3.25116	17.146	13.15422	-6.26904	-4.62944	-0.26577	-2.61114	-2.61165	-3.82883	-2.78863	-2.63595	-1.72597	-5.09333	-14.5599	-9.69877	-3.2589	-7.03117	7.73156	11.34419	-4.48622	3.50425	4.28986	5.10609	-7.22367	-1.62958	-3.41545	0.51991	-3.35726	-4.6415	-7.02339	-4.42007	-3.12027	-3.02734	-0.51351	-0.3797	1.92165	1.46835	-0.28765	0.61242	3.15533	0.22418	5.66643
82	7.10403	14.74622	2.69006	-0.64108	0.10201	7.65216	7.03883	-3.18625	17.89954	13.33735	-6.11476	-4.56738	-0.23975	-2.69276	-2.59444	-3.88841	-2.82598	-2.65395	-1.7615	-5.21085	-14.70739	-9.62683	-3.0123	-7.13781	7.77539	11.49346	-4.39406	3.63181	4.37775	5.13746	-7.34092	-1.60207	-3.40945	0.72091	-3.31759	-4.58297	-7.03356	-4.38237	-3.0905	-2.94661	-0.36372	-0.18952	2.10178	1.54601	-0.3308	0.64719	3.20101	0.24435	5.7527
83	7.81891	16.57994	3.10301	-0.36845	0.83435	10.24248	6.89303	-3.05642	19.50624	13.70362	-5.80621	-4.44326	-0.18772	-2.85599	-2.50629	-4.00756	-2.90068	-2.68996	-1.83257	-5.4459	-15.00236	-9.48295	-2.5191	-7.3511	7.92992	11.79201	-4.20973	3.88694	4.55353	5.2002	-7.57541	-1.54705	-3.39746	1.12292	-3.24595	-4.46591	-7.0539	-4.30696	-3.03096	-2.78515	-0.06414	0.19083	2.46204	1.70132	-0.22972	0.71674	3.29236	0.28471	5.92524
84	8.62782	17.59674	3.49804	-0.23214	1.26964	11.79957	6.82651	-2.58444	20.30959	14.05438	-5.62561	-4.3812	-0.1617	-2.93761	-2.46222	-4.06714	-2.83778	-2.68535	-1.8681	-5.4031	-15.00588	-9.41101	-2.2725	-7.45774	8.00718	11.94128	-4.00331	4.08331	4.64142	5.23853	-7.66136	-1.51954	-3.39147	1.32393	-3.21013	-4.40738	-6.98459	-4.22702	-3.0012	-2.7522	0.13288	0.38101	2.64217	1.77898	-0.17918	0.75152	3.30453	0.2287	6.01151
85	9.43673	18.61355	3.89307	-0.09582	1.70494	13.35665	6.75998	-2.11245	21.11294	14.40513	-5.44501	-4.31913	-0.13568	-3.01923	-2.41815	-4.12672	-2.77488	-2.68074	-1.90363	-5.3603	-15.0094	-9.33907	-2.0259	-7.56438	8.08445	12.09055	-3.79688	4.27968	4.72931	5.27686	-7.7473	-1.49203	-3.38548	1.52493	-3.1743	-4.34886	-6.91529	-4.14708	-2.97143	-2.71925	0.32989	0.57118	2.8223	1.85664	-0.12864	0.78629	3.3167	0.17269	6.09778
86	10.70004	19.63036	4.2881	0.04939	2.22042	14.91373	6.77229	-1.64046	21.95105	14.75589	-5.26407	-4.25707	-0.10967	-3.06401	-2.37407	-4.18629	-2.75373	-2.67613	-1.93916	-5.3175	-15.00852	-9.26713	-1.7793	-7.49746	8.16172	12.23983	-3.61647	4.47605	4.8172	5.31519	-7.75179	-1.46452	-3.37948	1.59387	-3.13848	-4.29034	-6.8067	-4.06714	-2.94166	-2.6863	0.6273	0.76136	3.00243	1.74895	-0.0781	0.82106	3.28958	0.11668	6.18405
87	11.96335	20.64716	4.68312	0.19459	2.73589	16.47081	6.78459	-1.16848	22.78917	15.10665	-5.08312	-4.19501	-0.08365	-3.10879	-2.33	-4.24587	-2.73259	-2.67152	-1.97469	-5.2747	-15.00765	-9.19519	-1.5327	-7.43054	8.23898	12.3891	-3.43607	4.67242	4.90509	5.35352	-7.75628	-1.43701	-3.37349	1.66281	-3.10266	-4.23181	-6.69811	-3.9872	-2.91189	-2.65335	0.92471	0.95153	3.18256	1.64126	-0.02756	0.85583	3.26246	0.06067	6.27032
88	14.847	22.78841	5.50331	1.80287	3.86804	19.55314	7.03765	0.32156	24.54335	16.25156	-4.72095	-4.07089	-0.06306	-3.05507	-2.27833	-4.36502	-2.72309	-2.6623	-2.04575	-5.18909	-15.00246	-9.05131	-1.02341	-6.62668	8.41356	12.68765	-3.0957	5.06516	5.08087	5.43018	-7.70127	-1.38199	-3.33696	1.57058	-3.02592	-4.11476	-6.45005	-3.82732	-2.85235	-2.58745	1.59841	1.33188	3.51948	1.63099	0.09018	0.92538	3.17735	-0.05135	6.44286
89	16.28882	23.88248	6.15452	2.7455	4.46716	21.06403	7.26553	1.27773	25.42044	16.99134	-4.53987	-4.00883	-0.30434	-3.0141	-2.27073	-4.4246	-2.71835	-2.6577	-2.08129	-5.14629	-14.99987	-8.97938	-0.64007	-6.15879	8.51088	12.83693	-2.92552	5.26153	5.16876	5.46851	-7.67376	-1.35448	-3.12233	1.50373	-2.985	-4.05624	-6.32602	-3.74738	-2.82258	-2.5545	1.93526	1.52205	3.50122	1.65233	0.15737	0.96015	3.1348	-0.10736	6.52913
90	17.73065	24.97656	6.80572	3.68813	5.06627	22.57492	7.49342	2.23391	26.29753	17.73112	-4.35878	-3.94677	-0.54563	-2.97312	-2.26313	-4.48418	-2.7136	-2.65309	-2.11682	-5.10349	-14.99727	-8.90744	-0.25674	-5.69091	8.60819	12.9862	-2.75534	5.4579	5.25665	5.50684	-7.64626	-1.32697	-2.9077	1.43687	-2.94407	-3.99771	-6.202	-3.66744	-2.79281	-2.52155	2.2721	1.71223	3.48295	1.67367	0.22457	0.99493	3.09225	-0.16337	6.6154
91	19.17247	26.09235	7.45692	4.63076	5.67502	24.08581	7.8209	3.26389	27.19424	18.55692	-4.1777	-3.8847	-0.78692	-2.93215	-2.25553	-4.54376	-2.70885	-2.63845	-2.15235	-5.01595	-14.99467	-8.8355	0.12659	-5.22302	8.70551	13.13548	-2.58516	5.63748	5.34454	5.50961	-7.61876	-1.29946	-2.69307	1.37001	-2.90315	-3.93918	-6.07797	-3.58524	-2.76304	-2.50955	2.60895	1.9024	3.46469	1.69501	0.29177	1.0297	3.04969	-0.19861	6.70167
92	20.6143	27.20815	8.10812	5.57339	6.28377	25.5967	8.14837	4.29387	28.09096	19.38272	-3.99662	-3.82264	-1.0282	-2.89117	-2.24792	-4.60333	-2.70411	-2.62381	-2.18788	-4.9284	-14.99207	-8.76356	0.50992	-4.75513	8.80283	13.28475	-2.41498	5.81705	5.43243	5.51237	-7.59125	-1.27195	-2.47844	1.30315	-2.86223	-3.88065	-5.95394	-3.50304	-2.73327	-2.49754	2.9458	2.09257	3.44642	1.71634	0.35897	1.06447	3.00714	-0.23386	6.78794
93	23.49794	29.50548	9.5143	7.45865	7.79544	28.3459	9.50018	7.17279	29.92419	21.9528	-3.63445	-3.69852	-1.52826	-2.80922	-2.23272	-4.80627	-2.69462	-2.53036	-2.25894	-4.46695	-14.98688	-8.61968	1.22571	-3.81935	8.99746	13.33845	-2.07461	6.06873	5.60821	5.29029	-7.53623	-1.21693	-2.02384	1.16943	-2.78039	-3.73967	-5.70589	-3.32417	-2.67373	-2.6076	3.6195	2.47292	3.43544	1.75902	0.49336	1.26837	2.92203	-0.17146	6.96048
94	24.93977	30.65875	10.6066	8.40128	8.51703	29.56592	10.24728	8.61224	30.8408	23.23785	-3.45337	-3.63646	-1.84391	-2.76824	-2.22041	-4.9601	-2.68987	-2.48364	-2.29447	-4.23623	-14.98428	-8.54774	1.39284	-3.35147	9.04647	13.21228	-1.90443	6.19458	5.6961	5.17925	-7.50873	-1.18942	-1.70153	1.10257	-2.73588	-3.65422	-5.58186	-3.23474	-2.64396	-2.66263	3.95634	2.6631	3.52578	1.78036	0.38852	1.45429	2.87948	-0.14025	7.04675
95	26.38159	31.81201	11.69889	9.34391	9.23862	30.78593	10.99437	10.0517	31.75741	24.52289	-3.27229	-3.5744	-2.15956	-2.72727	-2.2081	-5.11393	-2.68513	-2.43691	-2.33	-4.00551	-14.98168	-8.4758	1.55996	-2.88358	9.09548	13.0861	-1.73425	6.32042	5.78399	5.06821	-7.48122	-1.16191	-1.37922	1.03571	-2.69136	-3.56877	-5.45783	-3.1453	-2.61419	-2.71765	4.29319	2.85327	3.61613	1.80169	0.28368	1.64021	2.83692	-0.10905	7.13302
96	27.82341	32.99165	12.79118	10.47669	10.08855	32.00594	12.01832	11.7097	32.68538	26.11666	-3.09121	-3.51234	-2.4752	-2.69918	-2.19529	-5.26776	-2.78703	-2.43679	-2.36553	-3.83767	-14.97909	-8.40386	1.72709	-2.42458	9.13927	12.95993	-1.59801	6.38569	5.87188	4.85843	-7.45372	-1.1344	-1.05691	0.99762	-2.64646	-3.48332	-5.35283	-3.05639	-2.58442	-2.75969	4.63004	3.04345	3.70648	1.85946	0.16023	1.82613	2.81982	-0.08158	7.21929
97	29.26524	34.17128	13.88347	11.60946	10.93849	33.22596	13.04227	13.3677	33.61334	27.71042	-2.91012	-3.45028	-2.79085	-2.6711	-2.18247	-5.42159	-2.88893	-2.43666	-2.40106	-3.66982	-14.97649	-8.33192	1.89421	-1.96558	9.18306	12.83375	-1.46176	6.45095	5.95977	4.64864	-7.42621	-1.10689	-0.7346	0.95953	-2.60156	-3.39787	-5.24783	-2.96748	-2.55465	-2.80173	4.96689	3.23362	3.79683	1.91723	0.03679	2.01205	2.80271	-0.05412	7.30556
98	32.14889	36.53245	16.23104	15.34855	12.95027	35.28214	15.55118	16.85841	35.45995	31.15183	-2.54796	-3.32615	-3.42214	-2.65356	-2.15683	-5.72926	-3.306	-2.52959	-2.47213	-3.45989	-14.9713	-8.18804	2.22846	-1.34031	9.27063	12.5814	-1.25714	6.46033	6.13555	4.03159	-7.37119	-1.05187	-0.08998	1.09993	-2.51176	-3.22697	-5.07588	-2.79072	-2.49511	-2.85982	5.64059	3.61397	3.97752	2.38403	-0.21009	2.3839	2.81939	-0.00666	7.4781
99	33.59072	37.72188	17.78512	17.38103	13.98385	36.22036	16.92618	18.61008	36.38187	32.91437	-2.36687	-3.26409	-3.73778	-2.58582	-2.14401	-5.88309	-3.51454	-2.57606	-2.50766	-3.35493	-14.9687	-8.11611	2.39559	-1.29108	9.31442	12.45522	-1.15483	6.46502	6.22344	3.72307	-7.34369	-1.02436	0.23233	1.1875	-2.46686	-3.14152	-4.98991	-2.70234	-2.46534	-2.88887	5.97743	3.80415	4.06787	2.72737	-0.33353	2.56982	2.82773	0.01707	7.56437
100	35.03254	38.91131	19.3392	19.41352	15.01743	37.15858	18.30118	20.36174	37.30379	34.6769	-2.18579	-3.20203	-4.05343	-2.51807	-2.13119	-6.03692	-3.72308	-2.62253	-2.54319	-3.24996	-14.9661	-8.04417	2.56271	-1.24185	9.35821	12.32904	-1.05252	6.46972	6.31133	3.41454	-7.31618	-0.99685	0.55464	1.27506	-2.42196	-3.05607	-4.90393	-2.61396	-2.43557	-2.91792	6.31428	3.99432	4.15821	3.07071	-0.45697	2.75574	2.83607	0.04079	7.65064
* These data are from the obese group; data from healthy controls was extracted from Kozanek et al. J Biomech. 2009;42(12):1877-1884.
[truncated: 11 more columns]
